# Supplementary material for: Playing peekaboo with graphene oxide: a scanning electrochemical microscopy investigation
Source: Royal Society of Chemistry journal article supplement (doi:10.1039/c4cc06368f), 2014-09-02
Supplement: c4cc06368f1.pdf [file c4cc06368f1.pdf]

## **Supplementary Information**

for

### **Playing Peekaboo with Graphene Oxide: A Scanning Electrochemical Microscopy Investigation**

Stefania Rapino,<sup>a,\*</sup> Emanuele Treossi,<sup>b</sup> Vincenzo Palermo,<sup>b,\*</sup> Massimo Marcaccio,<sup>a</sup> Francesco Paolucci,<sup>a</sup> Francesco Zerbetto<sup>a</sup>

#### **Experimental**

##### **Scanning Electrochemical Measurements**

All measurements were accomplished using a CHI 410B Scanning ElectroChemical Microscope. Pt microelectrode was used as the probe (10  $\mu\text{m}$  diameter and with a glass to platinum radius ratio of 10) and was approached before the images using the feedback mode of SECM to ca. 8  $\mu\text{m}$  above the Au or SiOx surfaces in 1 mM FcMeOH,  $\text{Ru}(\text{NH}_3)_6\text{Cl}_3$ ,  $\text{Fe}(\text{CN})_6\text{K}_4$ , FcCOOH and  $\text{Na}_3(\text{IrCl}_6)$  in phosphate buffer saline solutions. The images were performed in constant height mode. After each image the redox solution was replaced with one of the others in order to image the same area of the gold (SiOx) surface. The applied potentials were +0.4 V for all the approaches and images performed in presence of FcMeOH and  $\text{Fe}(\text{CN})_6\text{K}_4$ , and -0.3 V for those performed in  $\text{Ru}(\text{NH}_3)_6\text{Cl}_3$ , reference electrode was Ag/AgCl (3M KCl), counter electrode was a Pt wire. All the chemicals for the redox solution preparations were purchased by Sigma Aldrich and used without any further purification.

##### **Fitting Procedures, Heterogeneous Rate Constants and Image Plotting**

MIRA software by Prof. Wittstock (<http://www.uni-oldenburg.de/chemie/pc2/pc2forschung/secm-tools/mira/>) was used for fitting all current approach curves and for plotting all the images. Approach curves were fitted by Cornut-Lefrou equations for purely negative feedback, purely positive feedback and for finite sample kinetics, tip/substrate separations and heterogeneous rate constants were accordingly evaluated. A first order heterogeneous rate constant in cm per second ( $k_{\text{eff}}$ ) can be determined using the dimensionless constants, obtained in the fitting procedures and reported in the text, accordingly to the following equation:

$$k = k_{\text{eff}} r_T / D$$

where  $r_T$  is the electrode radius and D the diffusion coefficient of the redox specie.

##### **1. Preparation of GO**

### **Preparation of GO and RGO adsorbed substrates**

Graphene oxide was prepared using a method that relies on previously described procedures (ref. 7 of the main text) and it is based on a modified Hummers method starting from graphite flakes.

The GO powder, dissolved in water, was spin coated at 2000 rpm on the Au and SiO<sub>x</sub> substrates. (ref. 7 main text)

The reduced GO flakes were obtained by thermal reduction of the GO deposited substrates at 700°C in vacuum. The detailed reduction procedure is reported in our reference 7 of the main text.

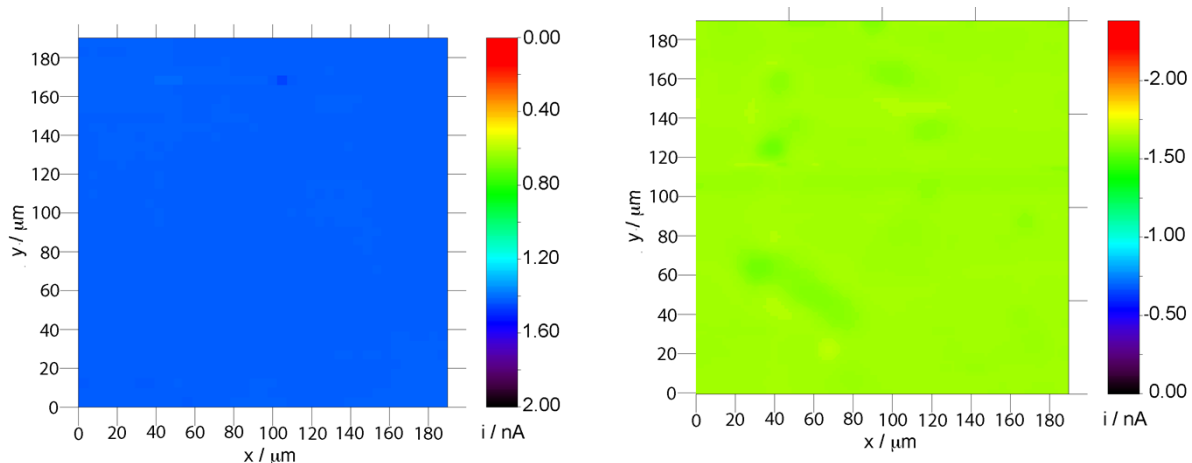

**Fig. S1** SECM image of GO sheets on Au in presence of I and III. Image size 200  $\mu\text{m}$ .  $E=0.4\text{ V}$  (I) and  $E=-0.3\text{ V}$  (III) vs Ag/AgCl/KCl 3M in PBS pH 7.4.

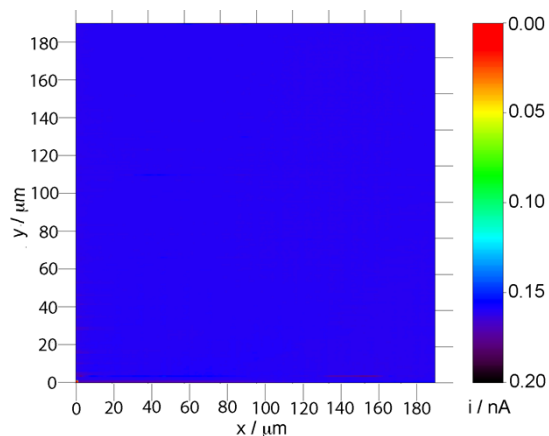

**Fig. S2**  $\text{SiO}_x$  surface with adsorbed reduced GO in presence of III. Image size 200  $\mu\text{m}$ .  $E=0.4\text{ V}$  vs Ag/AgCl/KCl 3M in PBS pH 7.4.

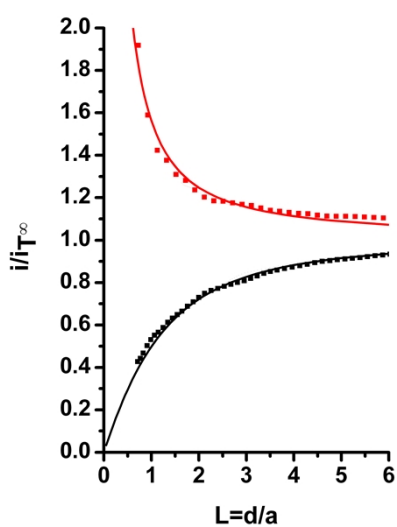

**Fig. S3** Theoretical positive (red solid line) and negative (black solid line) feedback approach curves. Experimental approach curves to  $\text{SiO}_x$  surface in presence of I (dashed black line) and to Au surface in presence of I (dashed red line).

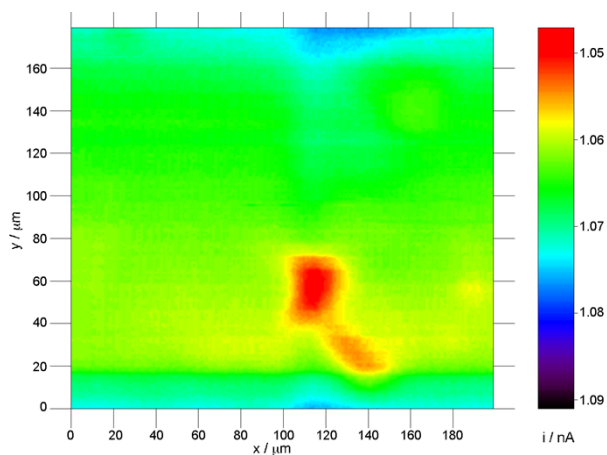

**Fig. S4** GO adsorbed on Au surface in presence of FcCOOH. Image size 200  $\mu\text{m}$ .  $E=0.5$  V vs Ag/AgCl/KCl 3M in PBS pH 7.4.

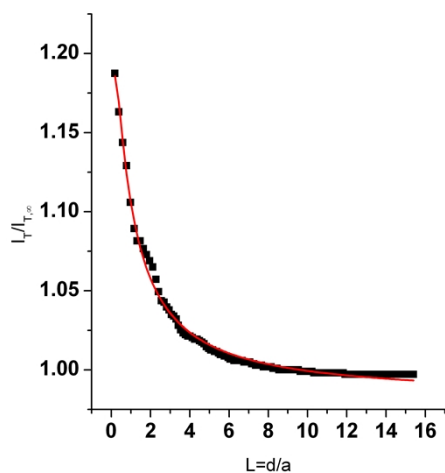

**Fig. S5** Experimental approach curve (dotted black line) and fitted curve (solid line) of the tip to GO adsorbed on gold in the presence of FcCOOH 1mM in PBS.

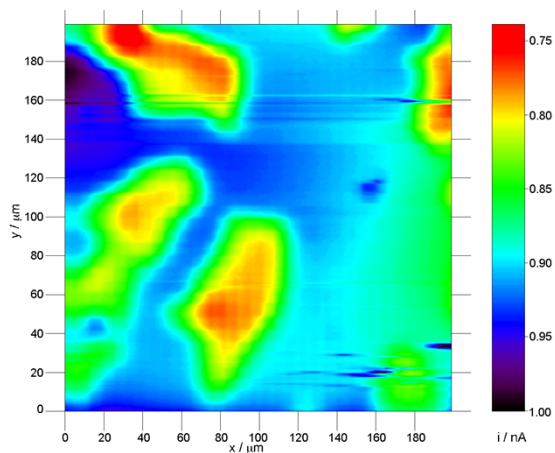

**Fig. S6** GO adsorbed on Au surface in presence of  $\text{Na}_3[\text{IrCl}_6]$ . Image size 200  $\mu\text{m}$ .  $E=0.9$  V vs Ag/AgCl/KCl 3M in PBS pH 7.4.

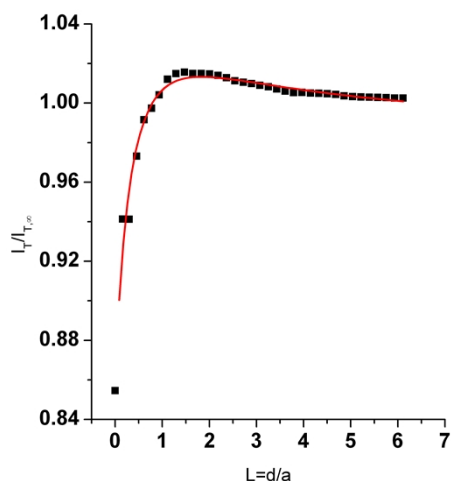

**Fig. S7** Experimental approach curve (dotted black line) and fitted curve (solid line) of the tip to GO adsorbed on gold in the presence of  $\text{Na}_3(\text{IrCl}_6)$  1mM in PBS.

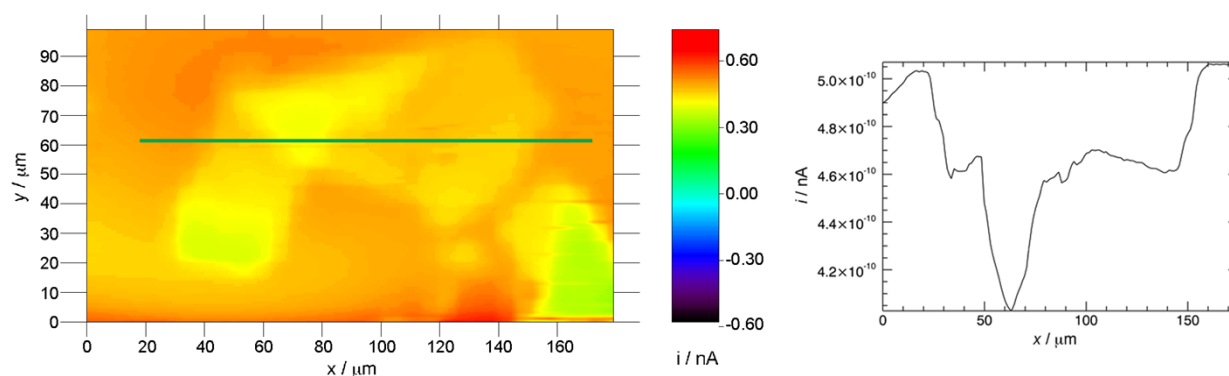

**Fig. S8** Left: SECM image of GO on Au using  $\text{Na}_3[\text{IrCl}_6]$  1 mM in PBS. The folded structure is in green. Right: Current along the line drawn in figure S8 left. Lower currents correspond to higher repulsion and therefore to the presence of a folded GO sheet.

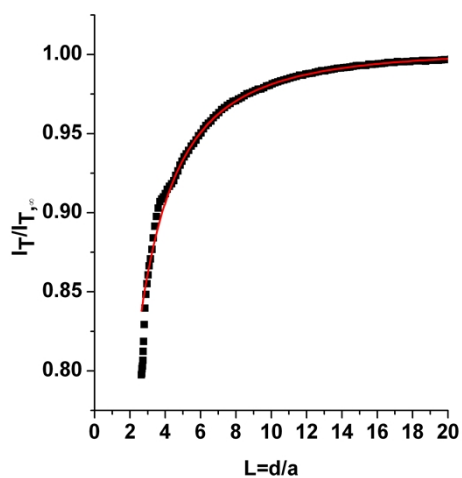

**Fig. S9** Experimental approach curve (dotted black line) and fitted curve (solid line) of the tip to RGO adsorbed on SiOx in the presence of FcMeOH 1mM in PBS.

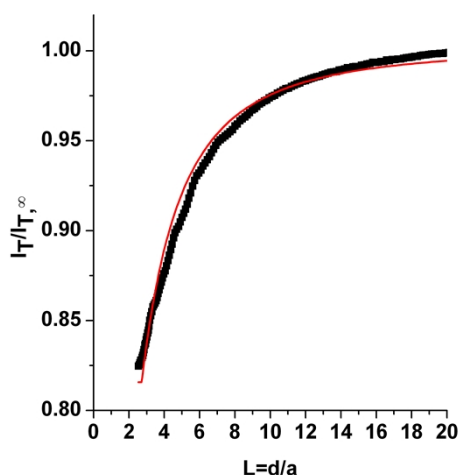

**Fig. S10** Experimental approach curve (dotted black line) and fitted curve (solid line) of the tip to RGO adsorbed on SiOx in the presence of  $[\text{Ru}(\text{NH}_3)_6]\text{Cl}_3$  1mM in PBS.

**Table S1** Summary of the feature of III, IV and V in the experiments. GO on gold.

| CONDUCTOR/METAL            | RGO/Au                     |                               |               |
|----------------------------|----------------------------|-------------------------------|---------------|
| Molecule:                  | IV                         | V                             | III           |
|                            | FcCOOH                     | $\text{Na}_3 [\text{IrCl}_6]$ | Fe(CN)6K4     |
| Molecule charge            | NEGATIVE -1                | NEGATIVE -3                   | NEGATIVE -4   |
| GO charge                  | NEGATIVE                   | NEGATIVE                      | NEGATIVE      |
| Substrate                  | Metal                      |                               |               |
| Charge Transfer rate to GO | MEDIUM/HIGH<br>K=1.42      | LOW<br>K=0.47                 | LOW<br>K=0.69 |
| Charge Transfer rate to Au | HIGH                       | HIGH                          | HIGH          |
| <b>CONTRAST</b>            | <b>POOR<br/>RESOLUTION</b> | <b>YES</b>                    | <b>YES</b>    |

**Table S2** Summary of the feature of I, II and II in the experiments. Reduced GO on gold.

| CONDUCTOR/METAL                          | RGO/Au    |                                       |           |
|------------------------------------------|-----------|---------------------------------------|-----------|
| Molecule:                                | I         | II                                    | III       |
|                                          | FcMeOH    | $\text{Ru}(\text{NH}_3)_6\text{Cl}_3$ | Fe(CN)6K4 |
| Molecule charge upon oxidation/reduction | POSITIVE  | POSITIVE                              | NEGATIVE  |
| RGO charge                               | NEGATIVE  | NEGATIVE                              | NEGATIVE  |
| Substrate                                | Metal     |                                       |           |
| Charge Transfer rate to RGO              | HIGH      | HIGH                                  | HIGH      |
| Charge Transfer rate to Au               | HIGH      | HIGH                                  | HIGH      |
| <b>CONTRAST</b>                          | <b>NO</b> | <b>NO</b>                             | <b>NO</b> |

**Table S3** Summary of the feature of I, II and II in the experiments. GO sheets on insulating SiOx.

| INSULATOR/INSULATOR                      | GO/SiOx   |                                       |                                    |
|------------------------------------------|-----------|---------------------------------------|------------------------------------|
| Molecule:                                | I         | II                                    | III                                |
|                                          | FcMeOH    | $\text{Ru}(\text{NH}_3)_6\text{Cl}_3$ | $\text{Fe}(\text{CN})_6\text{K}_4$ |
| Molecule charge upon oxidation/reduction | POSITIVE  | POSITIVE                              | NEGATIVE                           |
| GO charge                                | NEGATIVE  | NEGATIVE                              | NEGATIVE                           |
| Substrate                                | Insulator |                                       |                                    |
| Charge Transfer rate to GO               | LOW       | LOW                                   | LOW                                |
| Charge Transfer rate to SiOx             | LOW       | LOW                                   | LOW                                |
| <b>CONTRAST</b>                          | <b>NO</b> | <b>NO</b>                             | <b>NO</b>                          |

## References

- G. Wittstock, T. Asmus and T. Wilhelm, *Fresenius J Anal Chem*, 2000, **367**, 346-351.
- R. Cornut and C. Lefrou, *Journal of Electroanalytical Chemistry*, 2007, **608**, 59-66.
- R. Cornut and C. Lefrou, *Journal of Electroanalytical Chemistry*, 2008, **621**, 178-184.
